CORRECTION

# Correction: Novel enterprises digital transformation influence empirical study

Xiaowen Sun, Wenjing Sun, Zheng Wang

There are errors in the article title. The correct title is: Fiscal Subsidies and Digital Transformation: Empirical Evidence from Manufacturing Enterprises. The correct citation is: Sun X, Sun W, Wang Z (2024) Fiscal Subsidies and Digital Transformation: Empirical Evidence from Manufacturing Enterprises. PLoS ONE 19(1): e0296693. <https://doi.org/10.1371/journal.pone.0296693>.

## Reference

1. Sun X, Sun W, Wang Z. Novel enterprises digital transformation influence empirical study. PLoS One. 2024;19(1):e0296693. <https://doi.org/10.1371/journal.pone.0296693> PMID: [38215168](https://pubmed.ncbi.nlm.nih.gov/38215168/)

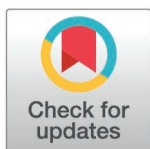

## OPEN ACCESS

**Citation:** Sun X, Sun W, Wang Z (2025) Correction: Novel enterprises digital transformation influence empirical study. PLoS One 20(7): e0328759. <https://doi.org/10.1371/journal.pone.0328759>

**Published:** July 21, 2025

**Copyright:** © 2025 Sun et al. This is an open access article distributed under the terms of the [Creative Commons Attribution License](https://creativecommons.org/licenses/by/4.0/), which permits unrestricted use, distribution, and reproduction in any medium, provided the original author and source are credited.
